# Supplementary material for: TTX-Bearing Planocerid Flatworm (Platyhelminthes: Acotylea) in the Ryukyu Islands, Japan
Source: PubMed Central journal article supplement (PMC5793085; doi:10.3390/md16010037), 2018-01-19
Supplement: marinedrugs-16-00037-s001.pdf [file marinedrugs-16-00037-s001.pdf]

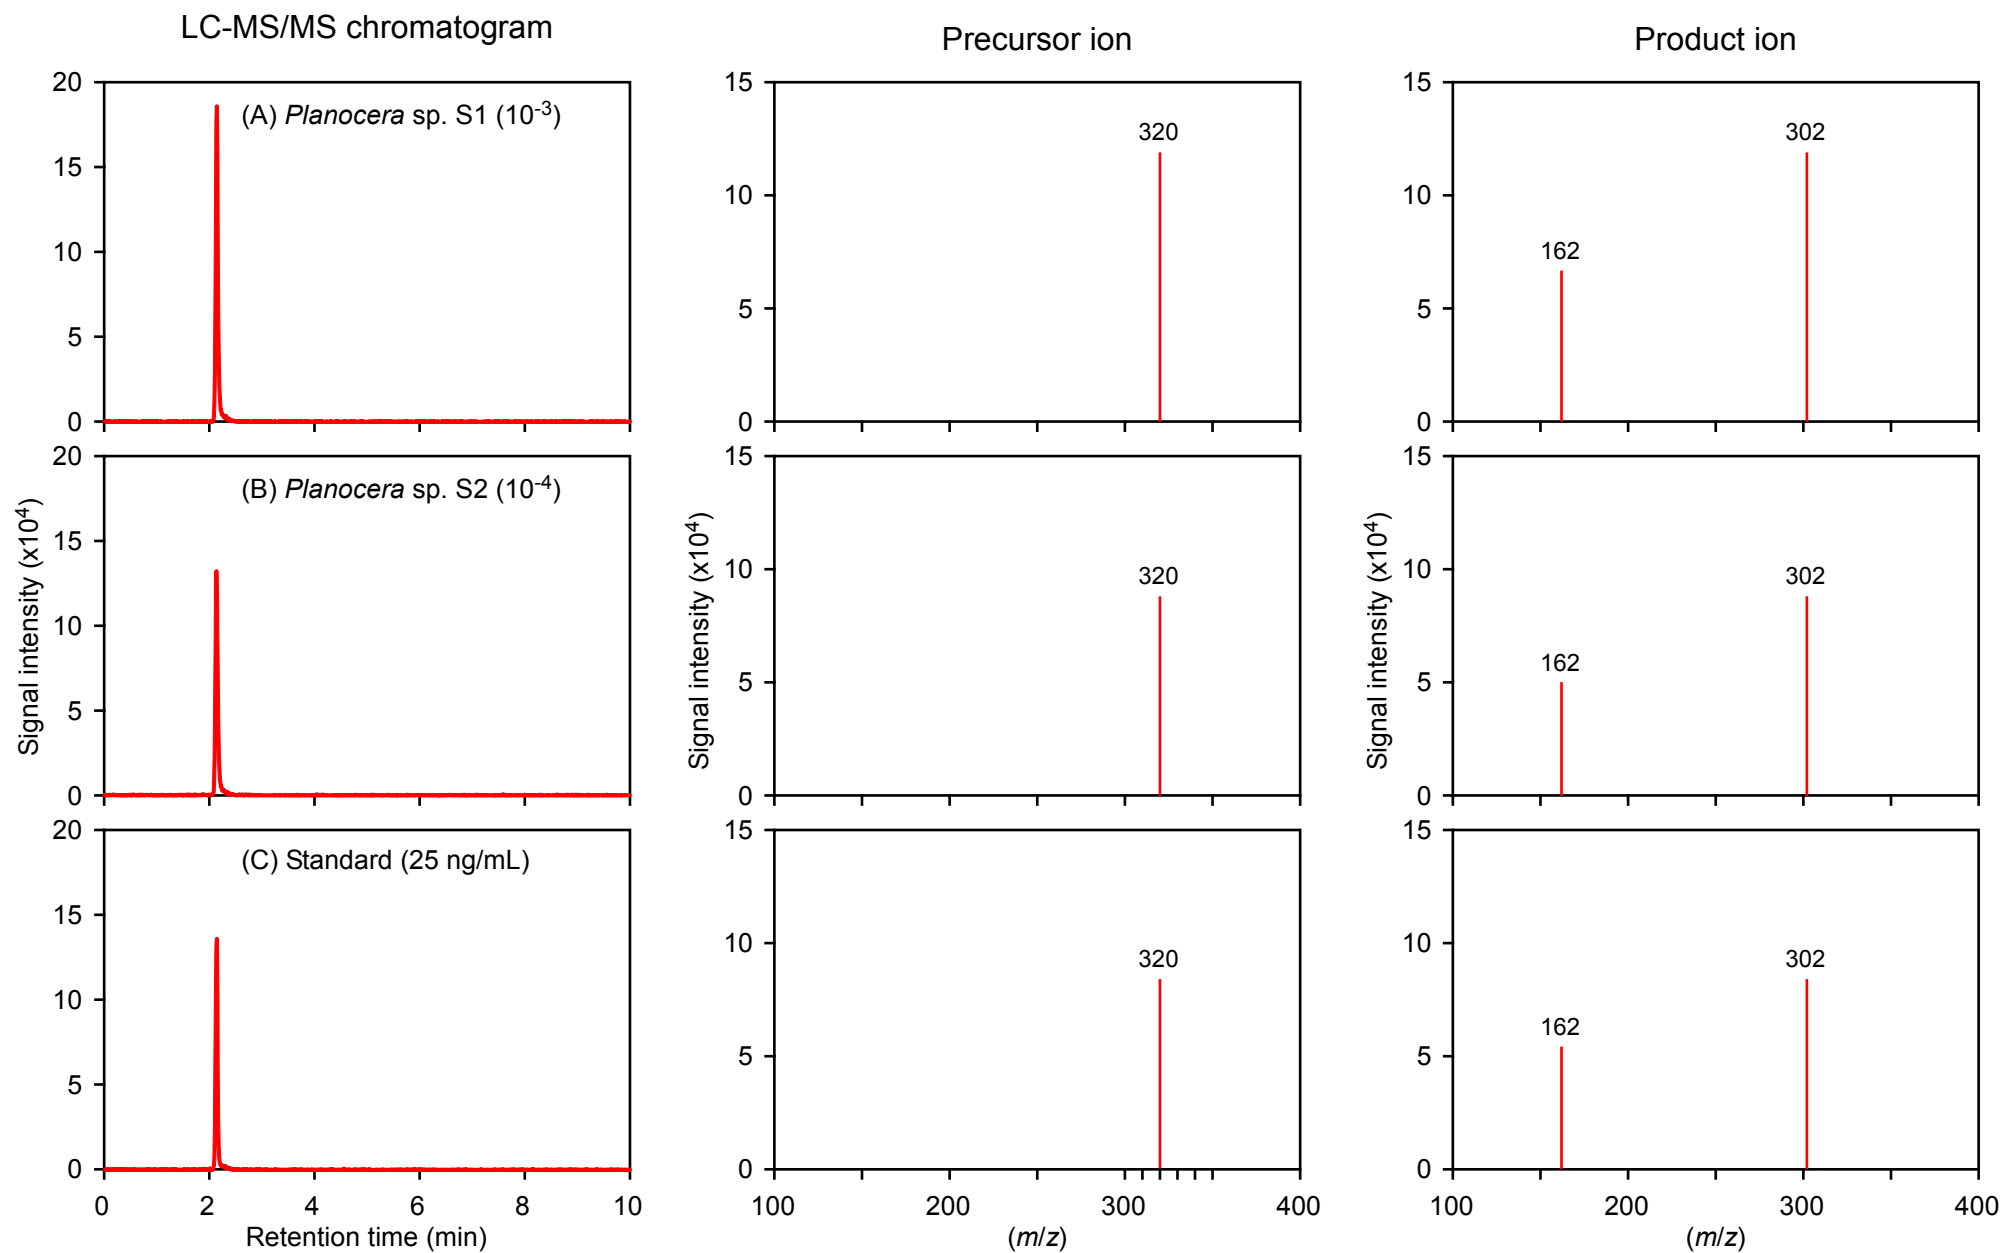

Figure S1. LC-MS/MS patterns of the TTX from planocerid flatworms specimen S1 (A) and S2 (B), and 25 ng/mL TTX standard (C). Left panels represent LC-MS/MS chromatograms, while the middle and right panels represent the mass spectrum of the precursor and product ions, respectively.
